# Supplementary material for: A smartphone-based fiber-optic aptasensor for label-free detection of Plasmodium falciparum glutamate dehydrogenase
Source: Royal Society of Chemistry journal article supplement (doi:10.1039/c9ay02406a), 2020-01-01
Supplement: c9ay02406a1.pdf [file c9ay02406a1.pdf]

### Supplementary information

#### **A Smartphone-based Fiber-optic Aptasensor for label-free detection of *Plasmodium falciparum* Glutamate dehydrogenase**

Manoharan Sanjay<sup>a</sup>, Naveen. K. Singh<sup>a</sup>, Lightson Ngashangva<sup>a</sup> and Pranab Goswami<sup>a\*</sup>

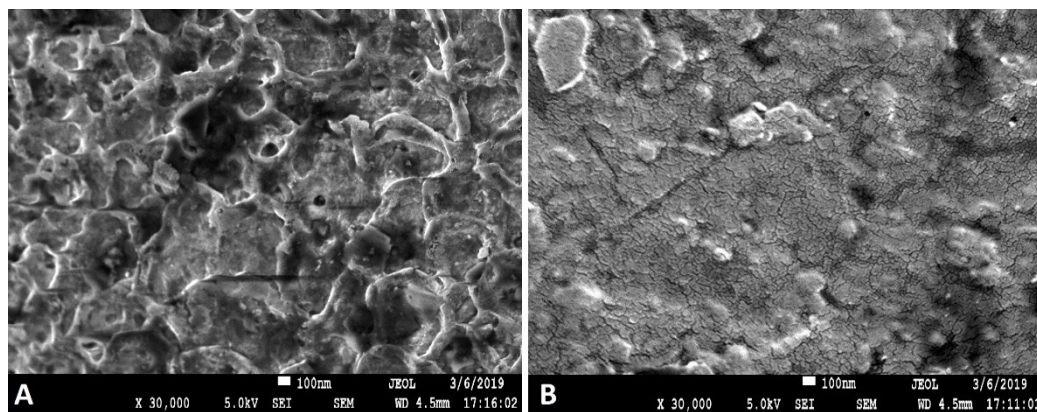

Fig. S1 FESEM images of A) Aptamer functionalized probe and B) Control gold probe

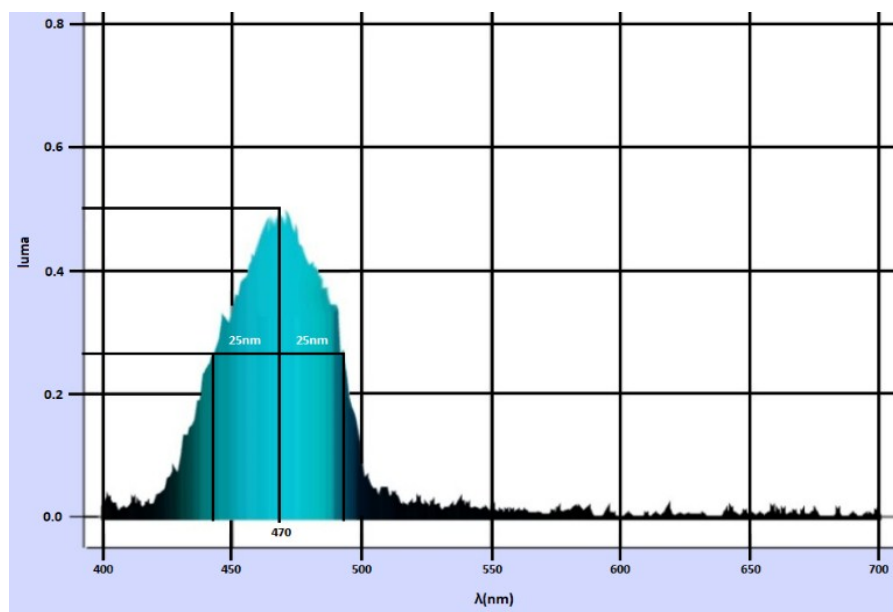

Fig.S2. Output wavelength evaluated using the image spectrum analyser

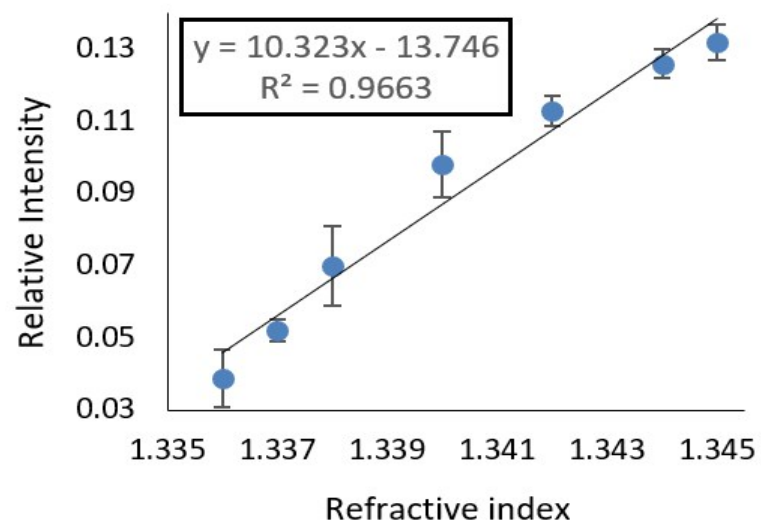

**Fig.S3:** The response of the sensor to different refractive index solutions
